# Supplementary material
Source: PubMed Central journal article supplement (PMC4576153)
Supplement: mmc1.pdf [file mmc1.pdf]

## **Supporting Material**

### **A Structural View of Negative Regulation of Toll-like Receptor-Mediated Inflammatory Pathway**

Emine Guven-Maiorov,<sup>1,2</sup> Ozlem Keskin,<sup>1,2,\*</sup> Attila GURSOY,<sup>2,3</sup> and Ruth Nussinov<sup>4,5,\*</sup>

<sup>1</sup>Department of Chemical and Biological Engineering; <sup>2</sup>Center for Computational Biology and Bioinformatics; and <sup>3</sup>Department of Computer Engineering, Koc University, Istanbul, Turkey; <sup>4</sup>Cancer and Inflammation Program, Leidos Biomedical Research, Inc. Frederick National Laboratory for Cancer Research, National Cancer Institute, Frederick, MD 21702, USA and <sup>5</sup>Sackler Institute of Molecular Medicine, Department of Human Genetics and Molecular Medicine, Sackler School of Medicine, Tel Aviv University, Tel Aviv, Israel

**Table S1:** Sequence identities, coverage, and normalized Z-scores between the query proteins and the template structures. The normalized Z-score greater than 1 implies a good alignment (1)

| Query protein | Template protein                                                                                               | PDB_ID of template | Sequence identity of query and template | Coverage | Normalized Z-score |
|---------------|----------------------------------------------------------------------------------------------------------------|--------------------|-----------------------------------------|----------|--------------------|
| BCAP          | PdTIR from <i>Paracoccus denitrificans</i>                                                                     | 3h16A              | 0.22                                    | 0.93     | 1.23               |
| BCAP          | TIR domain of Mal/TIRAP                                                                                        | 3ub2A              | 0.19                                    | 0.83     | 1.19               |
| BCAP          | <i>Brucella</i> protein TcpB TIR domain                                                                        | 4lqcA              | 0.21                                    | 0.86     | 1.13               |
| BCAP          | TIR domain from the <i>Arabidopsis Thaliana</i> disease resistance protein RRS1                                | 4c6sA              | 0.22                                    | 0.95     | 1.06               |
| SIGIRR        | TIR domain of human IL-1RAPL                                                                                   | 1t3gA              | 0.32                                    | 0.96     | 2.72               |
| ST2L          | TIR domain of human IL-1RAPL                                                                                   | 1t3gA              | 0.35                                    | 0.89     | 2.53               |
| ST2L          | Homology model of human Toll-like receptor 5 fitted into an electron microscopy single particle reconstruction | 3j0aA              | 0.22                                    | 0.87     | 3.5                |
| ST2L          | TIR domain of human TLR1                                                                                       | 1fyvA              | 0.23                                    | 0.87     | 2.63               |
| TLR4          | TIR domain of human TLR1                                                                                       | 1fyvA              | 0,39                                    | 0,97     | 2,76               |
| TLR4          | Homology model of human Toll-like receptor 5 fitted into an electron microscopy single particle reconstruction | 3j0aA              | 0.29                                    | 0.99     | 3.68               |
| TLR4          | TLR2 TIR domain                                                                                                | 1fyxA              | 0.4                                     | 0.97     | 2.77               |

**Table S2:** Details of interactions, namely the target and template structures, interaction energies obtained by PRISM and the references that show the physical interactions of the given protein pairs.

| PPI       | Protein1 | Protein2 | Template Interface | Interface Residues on Protein1                                                                               | Interface Residues on Protein2                                                                 |
|-----------|----------|----------|--------------------|--------------------------------------------------------------------------------------------------------------|------------------------------------------------------------------------------------------------|
| BCAP-TLR4 | Model    | Model    | 3dahAB             | H44, L46, G47, P48, E49, A50, S51, S53, A54, L57, Q76, H77, F78, K80, P81, A82, L83, P85, L86, L87, Q88, R89 | W686, E690, V692, K693, N694, E696, E697, G698, R709, D798, V800, L801, R803, H804, W807, R811 |
| BCAP-Mal  | Model    | 4lqdA    | 3urrAB             | E20, E21, Q24, Y25, Q27, T28, L29, L31, S32, Q35, I41, L42,                                                  | L152, K158, M161, L162, L165, E167, P188, P189, E190, R192, F193, M194                         |

|              |       |       |        |                                                                                                                              |                                                                                                                                                            |
|--------------|-------|-------|--------|------------------------------------------------------------------------------------------------------------------------------|------------------------------------------------------------------------------------------------------------------------------------------------------------|
|              |       |       |        | P129, E130, V133, A134                                                                                                       |                                                                                                                                                            |
| BCAP-MyD88   | Model | 4eo7A | 3flrAB | A54, L57, S58, L61, S62, R64, R89, A90, F91, H92, P94, H95                                                                   | S209, E210, E213, K214, F235, K238, F239, K241, S242, L243, S244                                                                                           |
| BCAP-TRAM    | Model | 2m1wA | 3bdvAB | F91, H92, P93, P94, R96, V97, V98, L111, D116, A118, H119, W120, K138, A139, E142, D143                                      | E87, D88, T90, D91, L94, R95, V96, N98, L99, Q101, D102, D103, I111, E114, L176, N177, E197, E198, F202                                                    |
| BCAP-TRIF    | Model | 2m1xA | 3dhxAB | P17, D18, E20, E21, W22, Q24, Y25, Q27, T28, L31, S32, Q35, Q39, K40, I41, T43, R45                                          | R463, L464, L466, H467, N470, M473, M474, S475, L477, G481, P483, D502, T503, S505, L506, S508                                                             |
| SIGIRR-TLR4  | Model | Model | 3imoBD | E209, L233, S234, R235, A236, C238, S239, S241, F242, R243, E244, P268, A269, A272, L275, Q278                               | D685, N689, K693, N694, E697, V699, V800, L801, R803, H804, W807, R808, R811                                                                               |
| SIGIRR-Mal   | Model | 4fz5A | 1unhBE | T260, R274, R277, Q278, R280, H281, V283, T284, L285, L286, L287, R289, D298, F299                                           | L152, P155, W156, K158, Y159, L162, T166, A185, A186, P188, P189, E190, R192                                                                               |
| SIGIRR-MyD88 | Model | 4domA | 3f13AB | A208, E209, P210, S211, A212, S234, R235, A236, C238, S239, F242, R243, E244, A272, L275                                     | R218, P245, G246, A247, H248, Q249, K250, R251, L252, I253, I267, F270, I271, T272, L295, P296                                                             |
| SIGIRR-TRAM  | Model | 2m1wA | 1pzmAB | Q264, R265, R266, D267, H270, L273, R274, R277, L285, L286, L287, R289, P290, G291                                           | E87, D88, D89, T90, D91, E92, R95, F112, A113, E114, M115, H117, H121, L122, Q123, N177                                                                    |
| SIGIRR-TRIF  | Model | 2m1xA | 1ntcAB | W237, C238, S241, F242, E244, C247, L250, E251, P271, A272, L275, L276, Q278, H279, R280, H281                               | A402, E429, N459, F460, D461, R463, L464, L466, H467, Q468, N470, S500, D502, S505, L506                                                                   |
| ST2L-TLR4    | Model | Model | 2bq1EF | L376, Y377, R385, Y387, E398, H402, D497, E410, N411, G414, T416, L417, C418, I419, G421, R422, D423, M424, L425, P426, K440 | S681, Q682, E684, D685, W686, N689, E690, L691, K693, N694, Q738, H739, I768, L770, Q771, K772, V773, E774, L777, W796, D798, S799, V800, L801, R803, W807 |
| ST2L-Mal     | Model | 3ub2A | 3urrAB | R385, Y387, S389, E398, H399, H402, Q403, I404, D407, E410, N411, I419, G421, R422, D515, N519, K520, R521, S522             | L152, Q153, P155, K158, Y159, L162, L165, T166, P188, P189, E190, R192, F193, M194                                                                         |
| ST2L-MyD88   | Model | 4eo7A | 2oh1CD | R396, E481, M482, E483, A484, L485, S486, E487, E494, Q497, T509, I510, K511, R513, E514, H516, I517, K526                   | L228, Q229, K231, D234, T237, L241, K262, E263, F264, P265, S266, I267, R269, F270                                                                         |
| ST2L-TRAM    | Model | 2m1wA | 3sf8AB | F458, E461, Q462, E463, V464, H467, M490, L491, Q492, A495, L496, S499, L503                                                 | D91, L94, R95, N98, L99, P175, L176, N177, P179, L180, P181, R184, E197, E198                                                                              |
| ST2L-TRIF    | Model | 2m1xA | 3grzAB | P384, R385, Y387, K388, S389, A394, S395, E398, V401, H402, R422, L425, P426                                                 | A402, V433, H434, S458, N459, F460, D461, R463, L466, H467, N470, Q471, Q498, S500, D502, L506                                                             |
| TRAF6-p62    | 2k0bX | 3hctA | 3jygAB | E65, S66, E69, C70, P71, L74, H87, V107                                                                                      | P387, A390, P392, R393, I395, E396, N421, Y422                                                                                                             |
| p62-CYLD     | 1q02A | 1whmA | 2yvzAB | A390, D391, L394, I395, L398, L402, E409, G410, G411, T414, L417,                                                            | S223, S225, P229, L230, N300, I303, P304, E305, S306, S307, G308, P309                                                                                     |

|            |       |       |        |                                                                                                    |                                                                          |
|------------|-------|-------|--------|----------------------------------------------------------------------------------------------------|--------------------------------------------------------------------------|
|            |       |       |        | Q418, T419                                                                                         |                                                                          |
| TRAF6-CYLD | 1whlA | 3hcuA | 2ekyBD | P62, P63, E65, S66, P71, H87, K104, C105, P106, V107, D108, N109                                   | V127, P130, R147, Q185, L186, F187, Q188, S207, G206, P209, S210         |
| TRAF6-A20  | 3hcsA | 3zjgB | 1f5qAB | Q54, D57, P71, I72, C73, L74, M75, C93, D100, A101, G102, K104, C105, P106, V107, D108, N109, P135 | K20, R24, T42, R45, Y46, Q241, Y244, D331, N334, P336, K337, E338, I339, |
| A20 dimer  | 2vfjB | 2vfjC | 3dkbCF | P7, L12, S13, N14, M15, R16, V19, R22, E23, D119, D344, L348, H351                                 | P7, L12, S13, N14, M15, R16, V19, R22, E23, D119, D344, L348, H351, E352 |
| TRAF3-DUBA | 3tmp  | 1flIA | 2a6aAB | H470, R505, R506, L508, G509, D510, F537, V538, A539, T541, V542, N545, G546                       | M191, D192, T195, Q198, W202, K205, Y301, T303, G304, T305, S306         |

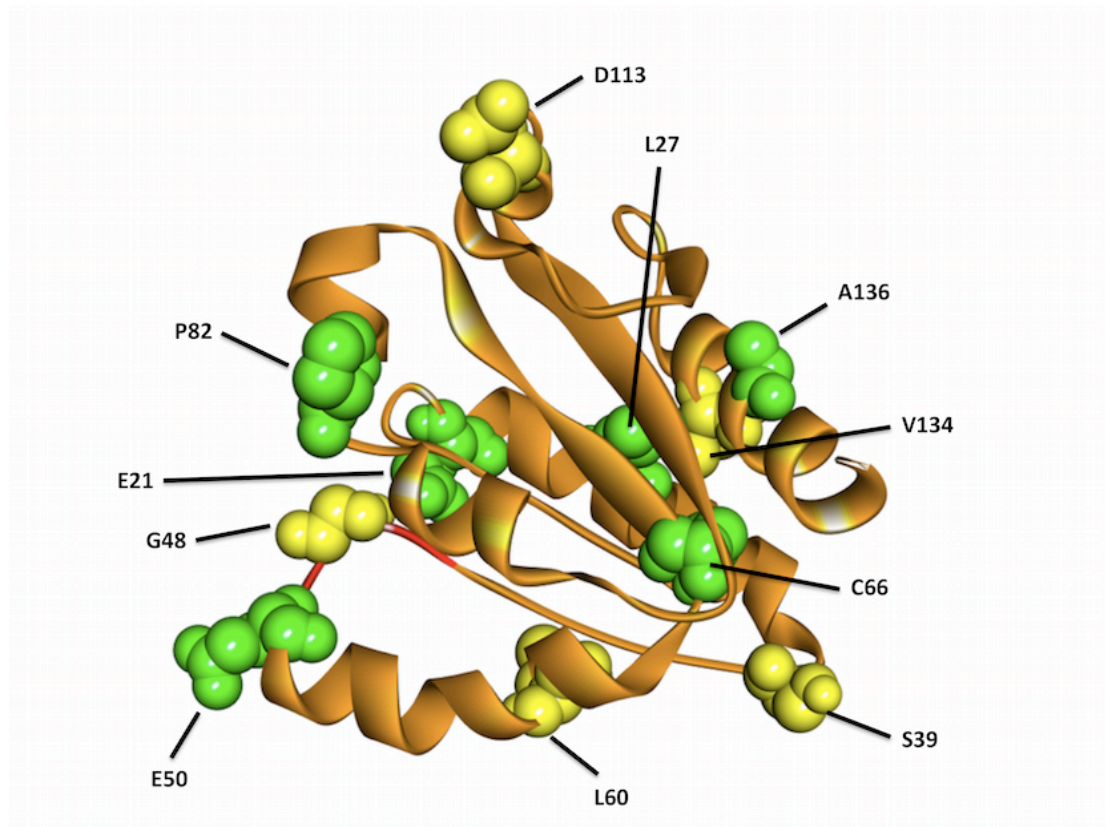

**Figure S1:** Clinically observed BCAP mutations that fall onto interfaces of BCAP interactions with other TIR domain-containing proteins. The mutations do not cluster at a particular location on 3D structure. The green-labeled residues abolish the interactions when they get mutated, but the yellow-labeled ones do not.

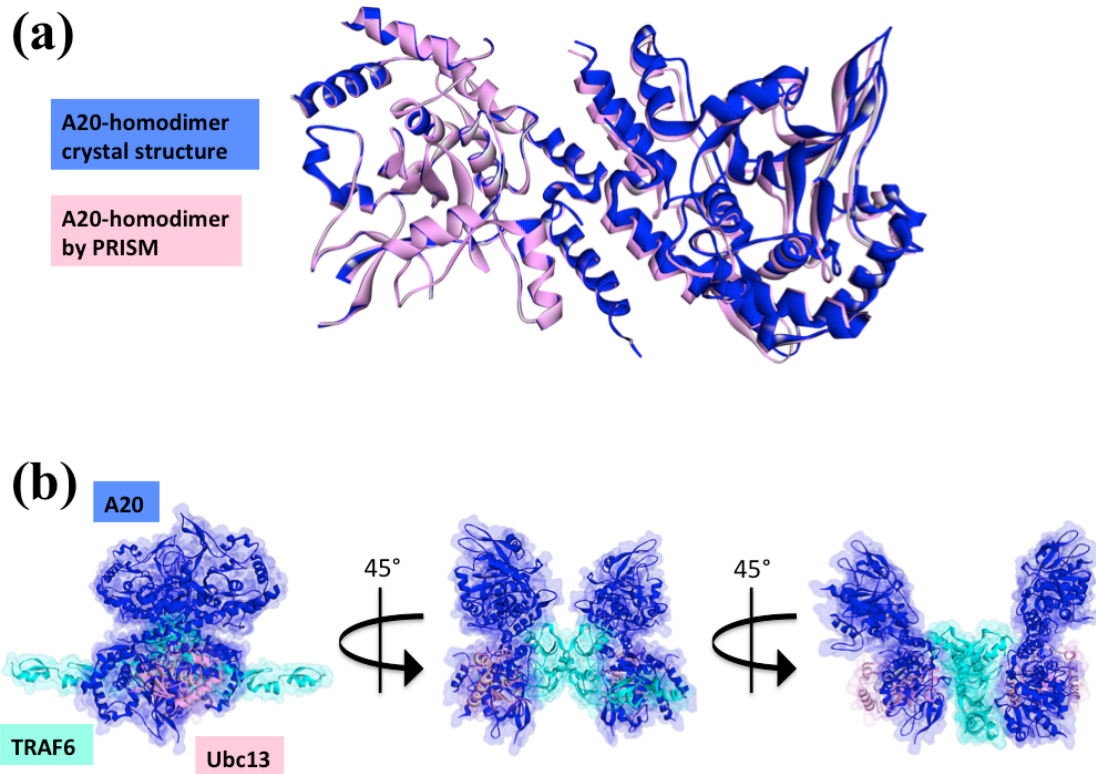

**Figure S2:** A20 needs to dimerize in order to execute its function. **(a)** We obtained A20-dimer structure that is very similar to the ones that are observed in asymmetric units of two pdb entries (3dkb\_CF and 2vfj\_BC), which were suggested to be biological. **(b)** Structure of TRAF6 interaction complex with A20-homodimer. This interaction interferes with TRAF6-Ubc13 interaction.

**Table S3:** Nonsense or frame-shift mutations on negative regulators. Although these mutations do not fall onto the interface residues, they lead to loss of the whole domain of the proteins that are covered in the PPI complexes modeled in this study.

| Cancer Study                  | Mutation | Mutation Type | Protein | Disrupted PPI                                                   |
|-------------------------------|----------|---------------|---------|-----------------------------------------------------------------|
| Stomach (TCGA pub)            | G9*      | Nonsense      | BCAP    | BCAP-TLR4, BCAP-Mal, BCAP-MyD88, BCAP-TRAM, BCAP-TRIF           |
| Prostate (Broad/Cornell 2012) | P2fs     | FS del        | SIGIRR  | SIGIRR-TLR4, SIGIRR-Mal, SIGIRR-MyD88, SIGIRR-TRAM, SIGIRR-TRIF |
| Bladder (TCGA)                | Q111*    | Nonsense      | SIGIRR  | SIGIRR-TLR4, SIGIRR-Mal, SIGIRR-MyD88, SIGIRR-TRAM, SIGIRR-TRIF |
| Esophagus (Broad)             | E30*     | Nonsense      | ST2     | ST2-TLR4, ST2-Mal, ST2-MyD88, ST2-TRAM, ST2-TRIF                |
| Lung adeno (TCGA pub)         | Y50fs    | FS del        | ST2     | ST2-TLR4, ST2-Mal, ST2-MyD88, ST2-TRAM, ST2-TRIF                |
| Lung adeno (TCGA pub)         | S125*    | Nonsense      | ST2     | ST2-TLR4, ST2-Mal, ST2-MyD88, ST2-TRAM, ST2-TRIF                |
| Stomach (TCGA pub)            | G228fs   | FS ins        | ST2     | ST2-TLR4, ST2-Mal, ST2-MyD88, ST2-TRAM, ST2-TRIF                |
| NCI-60                        | A248fs   | FS del        | ST2     | ST2-TLR4, ST2-Mal, ST2-MyD88, ST2-TRAM, ST2-TRIF                |
| chRCC (TCGA)                  | M285fs   | FS ins        | ST2     | ST2-TLR4, ST2-Mal, ST2-MyD88, ST2-TRAM, ST2-TRIF                |
| Stomach (Pfizer UHK)          | L350fs   | FS del        | ST2     | ST2-TLR4, ST2-Mal, ST2-MyD88, ST2-TRAM, ST2-TRIF                |
| Melanoma (Broad)              | W361*    | Nonsense      | ST2     | ST2-TLR4, ST2-Mal, ST2-MyD88, ST2-TRAM, ST2-TRIF                |
| Colorectal (TCGA pub)         | G47*     | Nonsense      | CYLD    | CYLD-p62, CYLD-TRAF6                                            |
| Colorectal (TCGA)             | G47*     | Nonsense      | CYLD    | CYLD-p62                                                        |
| CCELE                         | S159fs   | FS del        | CYLD    | CYLD-p62                                                        |
| Head & neck (TCGA)            | G179fs   | FS del        | CYLD    | CYLD-p62                                                        |
| Head & neck (TCGA pub)        | G179fs   | FS del        | CYLD    | CYLD-p62                                                        |
| NCI-60                        | E245*    | Nonsense      | CYLD    | CYLD-p62                                                        |

## REFERENCES

1. Roy, A., A. Kucukural, and Y. Zhang. 2010. I-TASSER: a unified platform for automated protein structure and function prediction. *Nature protocols* 5:725-738.
